# Supplementary material
Source: PubMed Central journal article supplement (PMC3098383)
Supplement: NIHMS63588-supplement-01.pdf [file NIHMS63588-supplement-01.pdf]

# Table 1

| Position                   | Exp. Peak (In.) | Charge State | M+H(In.)  | Theo. Mass | Error(ppm) |
|----------------------------|-----------------|--------------|-----------|------------|------------|
| 1-16(1Met-Ox)              | 541.9650        | 3            | 1623.8794 | 1623.8780  | -0.83      |
| 1-16(1Met-Ox)              | 812.4440        | 2            | 1623.8802 | 1623.8780  | -1.34      |
| 1-16(1Met-Ox,1Nit)         | 834.9350        | 2            | 1668.8622 | 1668.8631  | 0.55       |
| 6-16                       | 478.3010        | 2            | 955.5942  | 955.5940   | -0.18      |
| 6-16                       | 955.5930        | 1            | 955.5930  | 955.5940   | 1.05       |
| 17-41                      | 990.1520        | 3            | 2968.4404 | 2968.4406  | 0.07       |
| 17-42                      | 774.6400        | 4            | 3095.5365 | 3095.5326  | -1.27      |
| 17-42                      | 1032.5170       | 3            | 3095.5354 | 3095.5326  | -0.89      |
| 17-42(1Nit)                | 1047.5090       | 3            | 3140.5114 | 3140.5176  | 1.99       |
| 43-73(2Met-Ox)             | 899.4150        | 4            | 3594.6365 | 3594.6402  | 1.02       |
| 74-88                      | 538.6060        | 3            | 1613.8024 | 1613.7998  | -1.58      |
| 74-88                      | 807.4040        | 2            | 1613.8002 | 1613.7998  | -0.23      |
| 74-102                     | 1148.5759       | 3            | 3443.7121 | 3443.7170  | 1.44       |
| 89-97                      | 597.7820        | 2            | 1194.5562 | 1194.5544  | -1.49      |
| 89-101                     | 564.9510        | 3            | 1692.8374 | 1692.8346  | -1.62      |
| 89-102                     | 462.9900        | 4            | 1848.9365 | 1848.9357  | -0.45      |
| 89-102                     | 616.9830        | 3            | 1848.9334 | 1848.9357  | 1.27       |
| 89-102                     | 924.9720        | 2            | 1848.9362 | 1848.9357  | -0.26      |
| 89-102(1Nit)               | 631.9800        | 3            | 1893.9244 | 1893.9207  | -1.93      |
| 102-123(1Met-Ox)           | 806.4150        | 3            | 2417.2294 | 2417.2281  | -0.52      |
| 102-123(1Met-Ox,1CysO3)    | 822.4110        | 3            | 2465.2174 | 2465.2128  | -1.85      |
| 103-117(1Met-Ox)           | 544.6170        | 3            | 1631.8354 | 1631.8314  | -2.42      |
| 103-123                    | 749.0510        | 3            | 2245.1374 | 2245.1321  | -2.34      |
| 103-123                    | 1123.0700       | 2            | 2245.1322 | 2245.1321  | -0.03      |
| 103-123(1Met-Ox)           | 566.0380        | 4            | 2261.1285 | 2261.1270  | -0.67      |
| 103-123(1Met-Ox)           | 754.3790        | 3            | 2261.1214 | 2261.1270  | 2.50       |
| 103-123(1Met-Ox)           | 1131.0670       | 2            | 2261.1262 | 2261.1270  | 0.36       |
| 103-123(1Met-Ox,1CysO)     | 759.7140        | 3            | 2277.1264 | 2277.1219  | -1.95      |
| 103-123(1Met-Ox, 1Cys(NO)) | 764.3770        | 3            | 2291.1154 | 2291.1200  | 2.02       |
| 103-123(1Met-Ox,1CysO2)    | 765.0450        | 3            | 2293.1194 | 2293.1168  | -1.11      |
| 103-123(1Met-Ox,1CysO3)    | 578.0340        | 4            | 2309.1125 | 2309.1117  | -0.36      |
| 103-123(1Met-Ox,1CysO3)    | 770.3745        | 3            | 2309.1079 | 2309.1117  | 1.67       |
| 103-123(1Met-Ox,1CysO3)    | 1155.0620       | 2            | 2309.1162 | 2309.1117  | -1.94      |
| 103-117(1Met-Ox)           | 816.4200        | 2            | 1631.8322 | 1631.8314  | -0.47      |
| 103-128(1Met-Ox)           | 709.1110        | 4            | 2833.4205 | 2833.4188  | -0.61      |
| 103-128(1Met-Ox)           | 945.1450        | 3            | 2833.4194 | 2833.4188  | -0.19      |
| 105-123                    | 673.3270        | 3            | 2017.9654 | 2017.9687  | 1.66       |
| 105-123(1Met-Ox)           | 678.6610        | 3            | 2033.9674 | 2033.9636  | -1.84      |
| 105-123(1Met-Ox)           | 1017.4840       | 2            | 2033.9602 | 2033.9636  | 1.68       |
| 129-135                    | 401.2150        | 2            | 801.4222  | 801.4219   | -0.34      |
| 129-135                    | 801.4230        | 1            | 801.4230  | 801.4219   | -1.37      |
| 136-147                    | 664.8410        | 2            | 1328.6742 | 1328.6738  | -0.28      |
| 136-147(1Nit)              | 687.3350        | 2            | 1373.6622 | 1373.6589  | -2.38      |
| 148-161                    | 552.2905        | 3            | 1654.8559 | 1654.8553  | -0.33      |
| 148-161                    | 827.9320        | 2            | 1654.8562 | 1654.8553  | -0.53      |
| 148-161(1Nit)              | 850.4240        | 2            | 1699.8402 | 1699.8404  | 0.13       |
| 150-161                    | 466.5740        | 3            | 1397.7064 | 1397.7065  | 0.11       |
| 150-161                    | 699.3560        | 2            | 1397.7042 | 1397.7065  | 1.66       |
| 150-161                    | 1397.7030       | 1            | 1397.7030 | 1397.7065  | 2.50       |
| 150-161(1Nit)              | 721.8510        | 2            | 1442.6942 | 1442.6916  | -1.78      |
| 162-169                    | 540.3260        | 2            | 1079.6442 | 1079.6438  | -0.35      |
| 170-185(1Met-Ox)           | 560.2475        | 3            | 1678.7269 | 1678.7239  | -1.76      |
| 170-185(1Met-Ox)           | 839.8670        | 2            | 1678.7262 | 1678.7239  | -1.36      |
| 170-189                    | 688.9800        | 3            | 2064.9244 | 2064.9227  | -0.80      |
| 170-189(1Met-Ox)           | 694.3110        | 3            | 2080.9174 | 2080.9176  | 0.12       |
| 170-189(1Met-Ox)           | 1040.9630       | 2            | 2080.9182 | 2080.9176  | -0.28      |
| 170-189(1Met-Ox,1CysO3)    | 710.3070        | 3            | 2128.9054 | 2128.9023  | -1.43      |
| 170-189(1Met-Ox,1CysO3)    | 1064.9570       | 2            | 2128.9062 | 2128.9023  | -1.82      |
| 170-189(1Met-Ox,2CysO3)    | 1088.9490       | 2            | 2176.8902 | 2176.8870  | -1.46      |
| 170-189(1Met-Ox,3CysO3)    | 1112.9400       | 2            | 2224.8722 | 2224.8717  | -0.21      |
| 171-185(1Met-Ox)           | 775.8190        | 2            | 1550.6302 | 1550.6289  | -0.82      |
| 171-189(1Met-Ox)           | 976.9160        | 2            | 1952.8242 | 1952.8226  | -0.81      |
| 171-189(1Met-Ox,1CysO3)    | 1000.9070       | 2            | 2000.8062 | 2000.8073  | 0.56       |

**Error**  
**Average =1.09**  
 **$\sigma = 0.74$**

**Table 2 (Supplemental data)**

| Position | CAD      |            |            | Position | ECD      |            |            |
|----------|----------|------------|------------|----------|----------|------------|------------|
|          | M+H      | Theo. Mass | Error(ppm) |          | M+H      | Theo. Mass | Error(ppm) |
|          |          |            |            | c2       | 245.198  | 245.198    | 0.00       |
|          |          |            |            | c3       | 360.225  | 360.225    | 0.00       |
|          |          |            |            | c4       | 447.257  | 447.257    | 0.00       |
|          |          |            |            | c5       | 562.284  | 562.284    | 0.00       |
| b6       | 660.285  | 660.284    | -1.51      | c6       | 677.311  | 677.311    | 0.00       |
| b7       | 759.353  | 759.352    | -1.32      |          |          |            |            |
|          |          |            |            | c8       | 873.432  | 873.432    | 0.00       |
| b9       | 1003.440 | 1003.441   | 1.00       | c9       | 1020.468 | 1020.467   | -0.98      |
| b10      | 1102.508 | 1102.508   | 0.00       | c10      | 1119.536 | 1119.536   | 0.00       |
| b11      | 1215.594 | 1215.593   | -0.82      | c11      | 1232.620 | 1232.620   | 0.00       |
| b12      | 1314.662 | 1314.662   | 0.00       | c12      | 1330.680 | 1330.680   | 0.00       |
| b13      | 1371.683 | 1371.683   | 0.00       | c13      | 1388.708 | 1388.710   | 1.44       |
|          |          |            |            | c14      | 1502.750 | 1502.752   | 1.33       |
|          |          |            |            | c15      | 1630.846 | 1630.847   | 0.61       |
|          |          |            |            | c16      | 1781.836 | 1781.841   | 2.81       |
| b17      | 1879.840 | 1879.842   |            | c17      | 1896.865 | 1896.868   | 1.58       |
| b18      | 1992.928 | 1992.926   |            | c18      | 2009.950 | 2009.952   | 1.00       |
| b19      | 2063.964 | 2063.963   |            | c19      | 2080.990 | 2080.989   | -0.48      |
| b20      | 2134.998 | 2135.000   |            | c20      | 2152.028 | 2152.027   | -0.46      |
|          |          |            |            | z2       | 230.138  | 230.138    | 0.00       |
| y3       | 317.194  | 317.194    |            | z3       | 301.175  | 301.175    | 0.00       |
| y4       | 430.279  | 430.278    | -2.32      | z4       | 414.259  | 414.259    | 0.00       |
| y5       | 545.305  | 545.305    | 0.00       | z5       | 529.286  | 529.286    | 0.00       |
| y7       | 824.395  | 824.394    | -1.21      | z7       | 808.374  | 808.375    | 1.24       |
| y8       | 938.436  | 938.437    | 1.07       | z8       | 922.419  | 922.418    | -1.08      |
| y9       | 995.458  | 995.458    | 0.00       | z9       | 979.438  | 979.439    | 1.02       |
| y10      | 1094.526 | 1094.526   | 0.00       | z10      | 1078.510 | 1078.508   | -1.85      |
| y11      | 1207.609 | 1207.610   | 0.83       | z11      | 1191.594 | 1191.592   | -1.68      |
|          |          |            |            | z12      | 1290.658 | 1290.660   | 1.55       |
|          |          |            |            | z13      | 1437.700 | 1437.696   | -2.78      |
| y14      | 1550.768 | 1550.767   |            |          |          |            |            |
| y15      | 1649.836 | 1649.835   | -0.61      | z16      | 1748.843 | 1748.844   | 0.57       |
|          |          |            |            | z17      | 1863.876 | 1863.871   | -2.68      |
|          |          |            |            | z18      | 1950.900 | 1950.903   | 1.54       |
| y19      | 2081.946 | 2081.948   | 0.96       |          |          |            |            |

**Table 3 (Supplemental data)**

| CAD      |          |            |            | ECD      |          |            |            |
|----------|----------|------------|------------|----------|----------|------------|------------|
| Position | M+H      | Theo. Mass | Error(ppm) | Position | M+H      | Theo. Mass | Error(ppm) |
|          |          |            |            | c2       | 245.198  | 245.198    | 0.00       |
|          |          |            |            | c3       | 360.225  | 360.225    | 0.00       |
|          |          |            |            | c4       | 447.257  | 447.257    | 0.00       |
| b5       | 545.257  | 545.257    | 0.00       | c5       | 562.283  | 562.284    | 1.78       |
| b6       | 660.284  | 660.284    | 0.00       | c6       | 677.311  | 677.311    | 0.00       |
| b7       | 759.352  | 759.352    | 0.00       |          |          |            |            |
| b8       | 856.404  | 856.405    | 1.17       | c8       | 873.431  | 873.432    | 1.14       |
| b9       | 987.444  | 987.446    | 2.03       | c9       | 1004.473 | 1004.472   | -1.00      |
| b10      | 1086.513 | 1086.514   | 0.92       | c10      | 1103.541 | 1103.541   | 0.00       |
| b11      | 1199.600 | 1199.598   | -1.67      | c11      | 1216.625 | 1216.625   | 0.00       |
| b12      | 1298.665 | 1298.667   | 1.54       | c12      | 1315.693 | 1315.693   | 0.00       |
|          |          |            |            | c13      | 1372.714 | 1372.715   | 0.73       |
|          |          |            |            | c14      | 1486.756 | 1486.758   | 1.35       |
|          |          |            |            | c16      | 2022.93  | 2022.930   | 0.00       |
|          |          |            |            | c17      | 2137.96  | 2137.957   | -1.40      |
|          |          |            |            | c18      | 2251.040 | 2251.041   | 0.44       |
|          |          |            |            | c19      | 2322.086 | 2322.078   | -3.45      |
|          |          |            |            | c20      | 2393.112 | 2393.115   | 1.25       |
|          |          |            |            | z2       | 230.138  | 230.138    | 0.00       |
|          |          |            |            | z3       | 301.175  | 301.175    | 0.00       |
| y4       | 430.278  | 430.278    | 0.00       | z4       | 414.259  | 414.259    | 0.00       |
| y5       | 545.305  | 545.305    | 0.00       | z5       | 529.286  | 529.286    | 0.00       |
| y6       | 953.381  | 953.382    | 1.05       |          |          |            |            |
| y7       | 1081.478 | 1081.477   | -0.92      |          |          |            |            |
| y8       | 1195.518 | 1195.520   | 1.67       | z8       | 1178.500 | 1178.501   | 0.85       |
| y9       | 1252.538 | 1252.541   | 2.40       |          |          |            |            |
| y10      | 1351.607 | 1351.610   | 2.22       |          |          |            |            |
| y11      | 1464.694 | 1464.694   | 0.00       | z11      | 1448.674 | 1448.675   | 0.69       |
| y12      | 1563.762 | 1563.762   | 0.00       | z12      | 1547.744 | 1547.744   | 0.00       |
|          |          |            |            | z13      | 1678.784 | 1678.784   | 0.00       |
| y14      | 1791.854 | 1791.856   | 1.12       |          |          |            |            |
| y15      | 1890.922 | 1890.924   | 1.06       | z15      | 1874.908 | 1874.905   | -1.60      |
| y16      | 2005.952 | 2005.951   | -0.50      | z16      | 1989.934 | 1989.932   | -1.01      |
| y17      | 2120.978 | 2120.978   | 0.00       | z17      | 2104.966 | 2104.959   | -3.33      |
| y18      | 2208.006 | 2208.010   | 1.81       | z18      | 2191.992 | 2191.991   | -0.46      |
|          |          |            |            | z19      | 2307.016 | 2307.018   | 0.87       |
| y20      | 2451.126 | 2451.132   | 2.45       |          |          |            |            |
